# Supplementary material
Source: PubMed Central journal article supplement (PMC166420)
Supplement: pnas_1332765100_8.pdf [file pnas_1332765100_8.pdf]

## A

|                               | Helix                    | Turn | Helix |
|-------------------------------|--------------------------|------|-------|
| LacI consensus *              | TIKDVARLAGVSKSTVSRVLN    |      |       |
| <i>B. halodurans</i> _msmR    | MATIKDIAKLANVSNATVSRVLNR | 24   |       |
| <i>B. subtilis</i> _msmR      | MVRIKDIALKAKVSSATVSRILNE | 24   |       |
| <i>K. pneumoniae</i> _scrR    | RVTIKDIAELAGVSKATASLVLNG | 28   |       |
| <i>S. typhimurium</i> _scrR   | RVTIKDIAEQAGVSKATASLVLNG | 28   |       |
| <i>P. multocida</i> _scrR     | RITLSDIAKCCGLSTTVSMILNN  | 31   |       |
| <i>C. beijerinckii</i> _scrR  | KVTIQDIANMVNVSKSSVSRYLNN | 27   |       |
| <i>C. perfringens</i> _1533   | KVTIQDIANMVGVSKSTVSRYLNG | 26   |       |
| <i>B. halodurans</i> _1855    | MTTILDIKLAGVAKSTVSRYLNG  | 24   |       |
| <i>S. aureus</i> _scrR        | MKNISDIAKLAGVSKSTVSRFLNN | 24   |       |
| <i>S. xylosum</i> _scrR       | MKNLADIAGVSKSTVSRYLNN    | 24   |       |
| <i>E. faecalis</i> _0070      | VAKLTDVAELAGVSPPTVSRVINN | 35   |       |
| <i>S. pyogenes</i> _scrR      | VAKLTDVAALAGVSPPTVSRVINK | 25   |       |
| <i>S. agalactiae</i> _scrR    | VAKLTDVAALAGVSPPTVSRVINK | 25   |       |
| <i>S. mutans</i> _scrR        | VAKLTDVAKLAGVSPPTVSRVINR | 25   |       |
| <i>S. pneumoniae</i> _scrR    | VAKLTDVAKLAGVSPPTVSRVINK | 25   |       |
| <i>E. faecalis</i> _1604      | VVKLTDVAKLAGVSPPTVSRVINN | 28   |       |
| <i>L. lactis</i> _sacR        | MIKLEDVANKAGVSVTTVSRVINR | 24   |       |
| <i>L. acidophilus</i> _scrR   | PAKLSDVAREAGCSVTTVSRVINN | 25   |       |
| <i>L. gasseri</i> _scrR       | MVKLTDVAAGVSVTTVSRVINN   | 26   |       |
| <i>L. plantarum</i> _sacR     | KPKLNDVAKLAGVSAATVSRVINN | 25   |       |
| <i>P. pentosaceus</i> _scrR   | KPKLNDVAKLAGVSAATVSRVINN | 25   |       |
| <i>L. acidophilus</i> _msmR   | MATMKDVQRAGVGVGTVSRVINH  | 23   |       |
| <i>S. pneumoniae</i> _scrR2   | SITMKDVALEAGVSVGTVSRVINK | 32   |       |
| <i>V. alginolyticus</i> _scrR | --SLHDVARLAGVSKSTVSRVIND | 24   |       |
| <i>E. coli</i> _3626          | MASLKDVARLAGVSMMTVSRVMHN | 24   |       |
| <i>B. longum</i> _BL0107      | MVTMKETANKAGVSVSTVSRVLNG | 25   |       |
| <i>R. solanacearum</i> _scrR  | RPTIRDVATLAGVSTSTVSRVLNN | 34   |       |

## B

|                                    | NDPNG        | FRDP          | ECP          |
|------------------------------------|--------------|---------------|--------------|
| <i>L. acidophilus</i> _bfrA        | WINDPNGL 38  | SNFRDEPKV 161 | MTECPDYF 214 |
| <i>S. pneumoniae</i> _sacA         | WINDPNGF 45  | ADFRDPKL 170  | MWECPDYF 224 |
| <i>E. coli</i> _3625               | WMNDPNGL 43  | MHFRDPKV 165  | MWECPDFF 220 |
| <i>B. longum</i>                   | WINDPNGL 45  | HHYRDEPKV 167 | MLECPDF 222  |
| <i>P. multocida</i> _scrB          | LLNDPNGL 71  | EHVRDEPKP 190 | MWECPDLL 249 |
| <i>V. alginolyticus</i> _scrB      | LLNDPNGL 55  | EHFRDPKV 172  | MWECPDFF 228 |
| <i>L. acidophilus</i> _scrB        | LINDPNGF 51  | EHFRDQI 169   | MIECPNLV 226 |
| <i>L. gasseri</i> _scrB38          | LLNDPNGF 51  | EHFRDQL 170   | MIECPNLV 227 |
| <i>S. mutans</i> _scrB             | LLNDPNGF 51  | EHFRDQI 170   | MIECPNLV 228 |
| <i>S. sobrinus</i> _scrB           | LLNDPNGF 51  | EHFRDQI 170   | MIECPNLV 228 |
| <i>E. faecalis</i> _0069           | LLNDPNGF 51  | DHFRDQI 170   | MIECPNLL 228 |
| <i>S. pneumoniae</i> _scrB         | LLNDPNGF 51  | DHFRDQI 170   | MIECPNLV 228 |
| <i>S. agalactiae</i>               | LLNDPNGH 51  | EHFRDQI 170   | MIECPNII 228 |
| <i>S. pyogenes</i> _scrB           | LLNDPNGF 51  | EHFRDQL 170   | MIECPNLV 228 |
| <i>L. lactis</i> _sacA             | LLNDPNGF 51  | DHFRDQI 171   | MIECPNLI 229 |
| <i>L. plantarum</i> _sacA          | LLNDPNGF 51  | SSFRDPL 120   | MIECPNLV 176 |
| <i>P. pentosaceus</i> _scrB        | LLNDPNGF 51  | SSFRDPL 171   | MIECPKSG 227 |
| <i>E. faecalis</i> _1603           | LLNDPNGF 56  | SHFRDPMV 175  | MIECPNLV 233 |
| <i>S. aureus</i> _scrB             | LLNDPNGL 52  | SHFRDEPKV 172 | MWECPDYF 228 |
| <i>S. xylosum</i> _scrB            | LLNDPNGL 52  | QHFRDEPKV 172 | MWECPDYF 228 |
| <i>L. gasseri</i> _scrB58          | MLGDPNGF 77  | GHFRDPI 205   | MWECSDYF 261 |
| <i>C. beijerinckii</i> _scrB       | LINDPNGL 45  | AHFRDQI 164   | MWECPNII 220 |
| <i>C. perfringens</i> _sacA        | LINDPNGL 43  | AHFRDQI 162   | MWECPSFF 218 |
| <i>B. subtilis</i> _sacA           | LLNDPNGV 47  | AHFRDQI 167   | MWECPDF 226  |
| <i>G. stearothermophilus</i> _surA | LMNDPNGL 47  | AHFRDEK 167   | MWECPDF 226  |
| <i>B. halodurans</i> _sacA         | LLNDPNGF 47  | AHFRDEPKV 165 | MWECPDF 225  |
| <i>C. acetobutylicum</i> _sacA     | FMNDPNGL 45  | RHFRDQI 166   | MWECPNLF 226 |
| <i>K. pneumoniae</i> _scrB         | LLNDPNGF 45  | GHVRDEPKV 163 | MWECPDF 223  |
| <i>S. typhimurium</i> _scrB        | LMNDPNGF 45  | GHVRDEPKV 163 | MWECPDF 223  |
| <i>V. cholerae</i> _0655           | LLNDPNGF 112 | EHFRDQI 232   | MWECPDF 288  |
| <i>R. solanacearum</i> _scrB       | LLNDPNGL 33  | GHFRDQI 152   | MYECPDF 207  |
| <i>T. maritima</i> _bfrA           | WMNDPNGL 21  | HAFRDQI 141   | EIECPDLV 195 |
| <i>B. subtilis</i> _sacC           | WMNDPNGM 53  | KDFRDPK 175   | VWECPDF 228  |
| <i>S. mutans</i> _fruA             | WANDPNGL 499 | QDFRDEPKV 605 | HTECPDY 649  |
| <i>M. laevaniformans</i> _levM     | WMNDPQR 90   | RDFRDEPKV 221 | TIECPDLF 275 |
| <i>S. mutans</i> _fruB             | FMNDIQT 52   | QNARDQI 173   | LVECPNLK 234 |
