# Supplementary material
Source: PubMed Central journal article supplement (PMC166420)

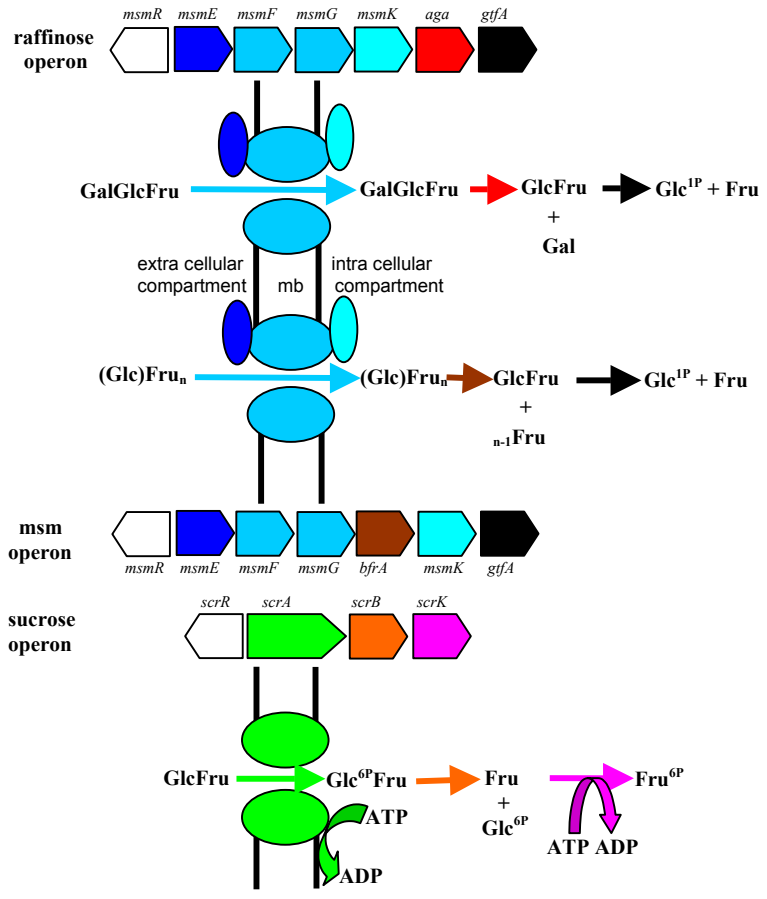

Supplement: pnas_1332765100_10.pdf [file pnas_1332765100_10.pdf]

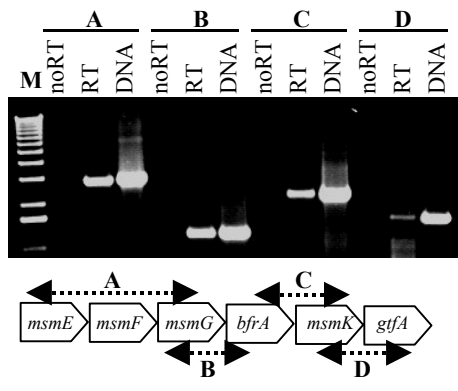

Supplement: pnas_1332765100_4.pdf [file pnas_1332765100_4.pdf]

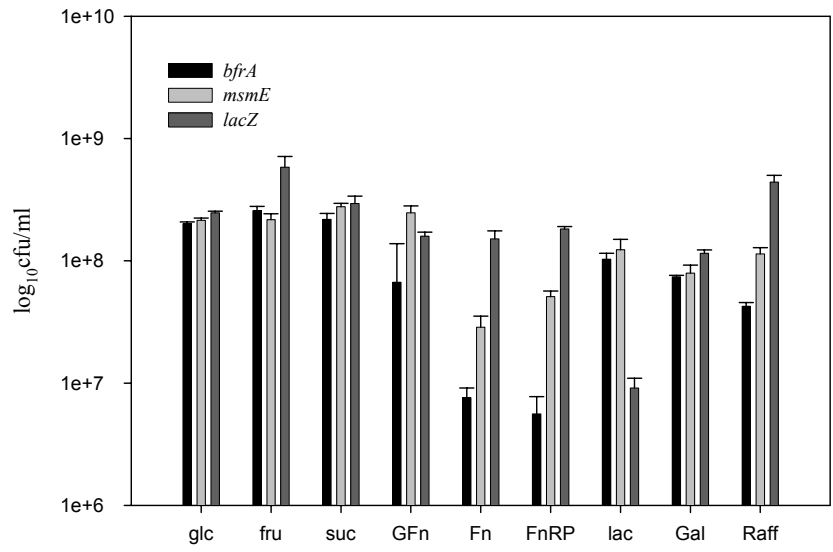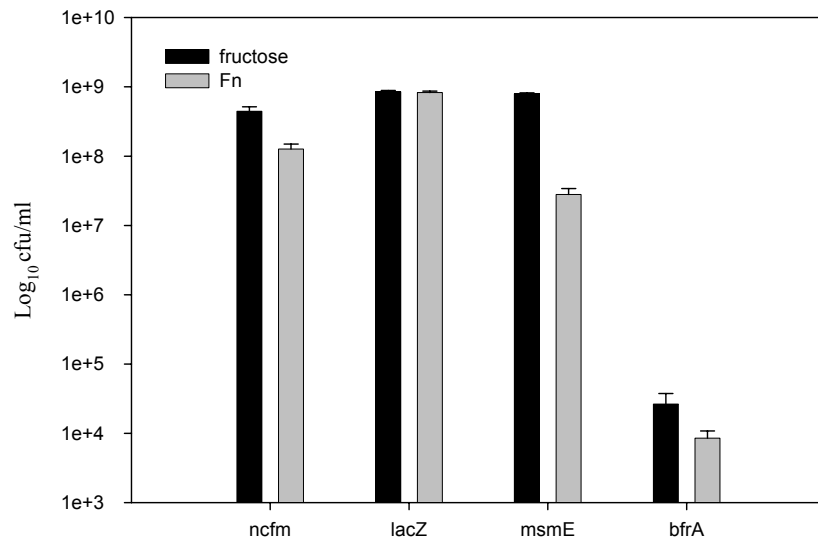

Supplement: pnas_1332765100_6.pdf [file pnas_1332765100_6.pdf]
